# Supplementary material for: Synthesis, structure and reactions of an amidinate stabilised trigallane
Source: Royal Society of Chemistry journal article supplement (doi:10.1039/c1dt10209e), 2011-01-01
Supplement: c1dt10209e.pdf [file c1dt10209e.pdf]

## Electronic Supplementary Information

| Crystallographic data of                                     | 2a,                                                                                          | 3a,                                                                            | 3b                                                                             | and | 3c                                                                                            |
|--------------------------------------------------------------|----------------------------------------------------------------------------------------------|--------------------------------------------------------------------------------|--------------------------------------------------------------------------------|-----|-----------------------------------------------------------------------------------------------|
| Compound                                                     | 2a                                                                                           | 3a                                                                             | 3b                                                                             |     | 3c                                                                                            |
| Empirical formula                                            | C <sub>60</sub> H <sub>90</sub> Ga <sub>2</sub> I <sub>2</sub> N <sub>4</sub> O <sub>2</sub> | C <sub>57</sub> H <sub>107</sub> Ga <sub>3</sub> I <sub>2</sub> N <sub>6</sub> | C <sub>58</sub> H <sub>101</sub> Ga <sub>3</sub> I <sub>2</sub> N <sub>6</sub> |     | C <sub>59</sub> H <sub>109</sub> Ga <sub>3</sub> I <sub>2</sub> N <sub>6</sub> O <sub>2</sub> |
| Formular weight [ $\frac{g}{mol}$ ]                          | 1292.60                                                                                      | 1339.45                                                                        | 1345.41                                                                        |     | 1397.48                                                                                       |
| Crystal size [mm <sup>3</sup> ]                              | 0.434 x 0.076 x 0.044                                                                        | 0.227 x 0.193 x 0.071                                                          | 0.416 x 0.157 x 0.137                                                          |     | 0.519 x 0.513 x 0.506                                                                         |
| Crystal system                                               | triclinic                                                                                    | triclinic                                                                      | triclinic                                                                      |     | monoclinic                                                                                    |
| Space group                                                  | P $\bar{1}$                                                                                  | P $\bar{1}$                                                                    | P $\bar{1}$                                                                    |     | P 2 <sub>1</sub> /n                                                                           |
| <i>a</i> [Å]                                                 | 10.847(2)                                                                                    | 12.831(3)                                                                      | 12.912(3)                                                                      |     | 13.486(3)                                                                                     |
| <i>b</i> [Å]                                                 | 12.842(3)                                                                                    | 13.914(3)                                                                      | 16.090(3)                                                                      |     | 22.613(5)                                                                                     |
| <i>c</i> [Å]                                                 | 22.349(5)                                                                                    | 20.005(4)                                                                      | 16.506(3)                                                                      |     | 21.158(4)                                                                                     |
| $\alpha$ [°]                                                 | 96.71(3)                                                                                     | 83.48(3)                                                                       | 78.66(3)                                                                       |     | 90.00                                                                                         |
| $\beta$ [°]                                                  | 91.80(3)                                                                                     | 83.11(3)                                                                       | 85.66(3)                                                                       |     | 90.95(3)                                                                                      |
| $\gamma$ [°]                                                 | 101.27(3)                                                                                    | 64.33(3)                                                                       | 71.01(3)                                                                       |     | 90.00                                                                                         |
| <i>V</i> [Å <sup>3</sup> ]                                   | 3027.5(11)                                                                                   | 3188.5(11)                                                                     | 3179.0(11)                                                                     |     | 6451(2)                                                                                       |
| <i>Z</i>                                                     | 2                                                                                            | 2                                                                              | 2                                                                              |     | 4                                                                                             |
| <i>D</i> <sub>calc</sub> [ $\frac{g}{cm^3}$ ]                | 1.418                                                                                        | 1.395                                                                          | 1.406                                                                          |     | 1.439                                                                                         |
| $\mu$ (Mo K $\alpha$ ) [ $\frac{1}{mm}$ ]                    | 1.952                                                                                        | 2.264                                                                          | 2.272                                                                          |     | 2.244                                                                                         |
| Absorption correction                                        | Numerical                                                                                    | Numerical                                                                      | Numerical                                                                      |     | Numerical                                                                                     |
| <i>T</i> <sub>min</sub> / <i>T</i> <sub>max</sub>            | 0.6121 / 0.9182                                                                              | 0.5944 / 0.8348                                                                | 0.6213 / 0.7632                                                                |     | 0.3763 / 0.4323                                                                               |
| <i>F</i> (000) [e]                                           | 1324                                                                                         | 1380                                                                           | 1380                                                                           |     | 2880                                                                                          |
| $\theta$ [°]                                                 | 1.92 .. 26.01                                                                                | 1.63 .. 26.06                                                                  | 2.66 .. 30.59                                                                  |     | 1.99 .. 25.99                                                                                 |
| Index ranges                                                 | -13 ≤ <i>h</i> ≤ 13<br>-15 ≤ <i>k</i> ≤ 15<br>-27 ≤ <i>l</i> ≤ 27                            | -15 ≤ <i>h</i> ≤ 15<br>-17 ≤ <i>k</i> ≤ 17<br>-24 ≤ <i>l</i> ≤ 24              | -18 ≤ <i>h</i> ≤ 18<br>-22 ≤ <i>k</i> ≤ 22<br>-23 ≤ <i>l</i> ≤ 23              |     | -16 ≤ <i>h</i> ≤ 16<br>-27 ≤ <i>k</i> ≤ 27<br>-26 ≤ <i>l</i> ≤ 25                             |
| Reflections collected                                        | 23545                                                                                        | 25396                                                                          | 38406                                                                          |     | 37090                                                                                         |
| Independent reflections                                      | 11042                                                                                        | 11664                                                                          | 17618                                                                          |     | 11096                                                                                         |
| Observed refl. [ <i>I</i> > 2 $\sigma$ ( <i>I</i> )]         | 3830                                                                                         | 4596                                                                           | 5883                                                                           |     | 5738                                                                                          |
| Completeness of data                                         | $\theta = 26.01^\circ$ ; 92.6%                                                               | $\theta = 26.06^\circ$ ; 92.4%                                                 | $\theta = 30.59^\circ$ ; 90%                                                   |     | $\theta = 25.99^\circ$ ; 87.6%                                                                |
| Data/restraints/parameters                                   | 11042 / 6 / 631                                                                              | 11664 / 0 / 578                                                                | 17618 / 42 / 622                                                               |     | 11096 / 0 / 649                                                                               |
| Goodness of fit ( <i>S</i> ) on <i>F</i> <sup>2</sup>        | 0.648                                                                                        | 0.756                                                                          | 0.718                                                                          |     | 0.945                                                                                         |
| Final <i>R</i> indices [ <i>I</i> > 2 $\sigma$ ( <i>I</i> )] | 0.0455<br>0.0737                                                                             | 0.0558<br>0.1193                                                               | 0.0545<br>0.1113                                                               |     | 0.0763<br>0.1728                                                                              |
| <i>R</i> indices (all data)                                  | 0.1546<br>0.0912                                                                             | 0.1554<br>0.1416                                                               | 0.1697<br>0.1406                                                               |     | 0.1445<br>0.1997                                                                              |
| Max diff. peak/hole [ $\frac{e}{\text{\AA}^3}$ ]             | 0.733/-0.843                                                                                 | 0.959/-1.131                                                                   | 2.010/-1.091                                                                   |     | 1.136/-0.807                                                                                  |
| <i>w</i> <sub>1</sub>                                        | 0.0176                                                                                       | 0.0550                                                                         | 0.0462                                                                         |     | 0.1013                                                                                        |
| CCDC reference number                                        | 811975                                                                                       | 811977                                                                         | 811978                                                                         |     | 811979                                                                                        |
